# Supplementary material for: Influence of Fat and Carbohydrate Proportions on the Metabolic Profile in Patients With Type 2 Diabetes: A Meta-Analysis
Source: Oxford University Press journal article supplement (doi:10.2337/dc08-1716), 2009-04-30
Supplement: dc08-1716_online_appendix.doc [file dc08-1716_online_appendix.doc]

**Table A1** %Changes in parameters related to glycemic control for the individual studies included in the meta-analysis

| │%Change [95%CI] | A1C | FPG | 2h-GLU | F-INS | 2h-INS |
| --- | --- | --- | --- | --- | --- |
| Campbell et al. (1994)(13) | N/A | 3.3 [-25.7; 32.3] | 7.3 [-26; 40.6] | 6.5 [-37.3; 50.3] | 22.2 [-44.9; 89.3] |
| Chen et al. (1995)(14) | N/A | -8.5 [-28.1; 11.1] | 13 [1.4; 24.6]* | 9.2 [-33; 51.4] | 31 [13.2; 48.8]** |
| Coulston et al. (1989)(15) | N/A | 2.7 [-11.9; 17.3] | 12.2 [-7.1; 31.5] | 12.5 [-42.9; 67.9] | 13.1 [-10.4; 36.6] |
| Fuh et al. (1990)(16) | N/A | 3.3 [-12.4; 19] | N/A | 11.5 [-26.5; 49.5] | N/A |
| Garg et al. (1992)(17) | 8 [-23.1; 39.1] | 3.4 [-6.2; 13] | N/A | -4.3 [-43; 34.4] | N/A |
| Garg et al. (1994)(18) | 3.8 [-6.1; 13.7] | 3.5 [-17.8; 24.8] | N/A | 0 [-23.5; 23.5] | N/A |
| Heilbronn et al. (1999a)(19) | -5.5 [-16; 5] | -6 [-24.2; 12.2] | N/A | 2.3 [-26.4; 31] | N/A |
| Heilbronn et al. (1999b)(19) | -4.8 [-18.6; 9] | 0.2 [-20.7; 21.1] | N/A | 12.7 [-11.2; 36.6] | N/A |
| Lovejoy et al. (2002a)(20) | 1.4 [-10.5; 13.3] | 6 [-9.6; 21.6] | N/A | 1.4 [-29.3; 32.1] | N/A |
| Lovejoy et al. (2002b)(20) | -5.6 [-17.1; 5.9] | -8.4 [-25.2; 8.4] | N/A | 5.4 [-23.9; 34.7] | N/A |
| Luscombe et al. (1999)(21) | N/A | -1 [-24.9; 22.9] | N/A | -8.1 [-31.6; 15.4] | N/A |
| Miyashita et al. (2004)(22) | N/A | 0.8 [-9.3; 10.9] | N/A | 30 [6.3; 53.7]* | N/A |
| Parillo et al. (1992)(23) | N/A | 5.6 [-22.1; 33.3] | 15.1 [-9.5; 39.7] | 19.4 [-13.6; 52.4] | 25.3 [-11.2; 61.8] |
| Parillo et al. (1996a)(24) | N/A | -3 [-31.6; 25.6] | 9 [-14.8; 32.8] | -11.1 [-80.4; 58.2] | 29.2 [-14.2; 72.6] |
| Parillo et al. (1996b)(24) | N/A | -3.9 [-31.2; 23.4] | 23.6 [-17; 64.2] | 33.3 [-3.2; 69.8] | 11.9 [-17.8; 41.6] |
| Rodriguez-Villar et al. (2000)(25) | -3.1 [-15.8; 9.6] | -10.8 [-30.9; 9.3] | 9.3 [4.9; 13.7]** | -15 [-59.9; 29.9] | 4.9 [-4; 13.8] |
| Rodriguez-Villar et al. (2004)(26) | -1.5 [-9.5; 6.5] | -7.3 [-35.6; 21] |  | -11.4 [-46.7; 23.9] | N/A |
| Rusmussen et al. (1994)(27, 28) | -1.4 [-19; 16.2] | 11.5 [-5.3; 28.3] | 31.6 [7; 56.2]* | 11.4 [-35.3; 58.1] | 19.6 [-32.8; 72] |
| Sestoft et al. (1985)(29) | N/A | 5 [-3.9; 13.9] | 3.3 [-10.4; 17] | 23.8 [2.5; 45.1]* | N/A |
| Simpson et al. (1982)(30) | 0 [-14.3; 14.3] | -10.2 [-31.7; 11.3] | 19.2 [-3.2; 41.6] | -24.6 [-161.7;112.5] | 35 [-83.7; 153.7] |
| Storm et al. (1997a)(31) | N/A | -2.5 [-10.9; 5.9] | N/A | -2.8 [-60.1; 54.5] | N/A |
| Storm et al. (1997b)(31) | N/A | -1.3 [-9.7; 7.1] | N/A | -27.1 [-133.4; 79.2] | N/A |

Abbreviations: CI=confidence intervals; N/A=Not assessed; A1C=HbA1C; FPG=fasting plasma glucose; 2h-Glu=2-h postprandial glucose; F-INS=fasting insulin level; 2h-INS=2-h postprandial insulin level

│For example, A1C changed from 10.0% to 8.0% in LFHC-diet group and from 10.0% to 9.0% in HFLC-diet. %Change was calculated as follows:

Significant %Change was indicated as * for *P*<0.05 and ** for *P*<0.01

**Table A2** %Changes in parameters related to blood lipid values for the individual studies included in the meta-analysis

| %Change [95%CI] | TG | TC | HDL-C | LDL-C |
| --- | --- | --- | --- | --- |
| Campbell et al. (1994)(13) | 27.3 [-8.5; 63.1] | 9.3 [-10; 28.6] | 0 [-34.6; 34.6] | 6.7 [-21; 34.4] |
| Chen et al. (1995)(14) | 48.3 [9.8; 86.8]* | N/A | N/A | N/A |
| Coulston et al. (1989)(15) | 27.8 [-8.5; 64.1] | 1.3 [-15.8; 18.4] | 6.8 [-10.7; 24.3] | -11.5 [-31.9; 8.9] |
| Fuh et al. (1990)(16) | 25.2 [-26.2; 76.6] | -0.6 [-10.9; 9.7] | 2.9 [-12.9; 18.7] | -2.9 [-16.2; 10.4] |
| Garg et al. (1992)(17) | 27.5 [-8.4; 63.4]** | 4.7 [-10.3; 19.7] | 11.8 [-4.7; 28.3] | 0 [-31.9; 31.9] |
| Garg et al. (1994)(18) | 25.2 [6.2; 44.2] | 2.1 [-5.8; 10] | 4.5 [-7; 16] | 0 [-9.4; 9.4] |
| Heilbronn et al. (1999a)(19) | -3.8 [-46.4; 38.8] | -0.4 [-21.9; 21.1] | 10.7 [-4.6; 26] | -19.5 [-42.4; 3.4] |
| Heilbronn et al. (1999b)(19) | 5.2 [-48.4; 58.8] | 7.4 [-3.3; 18.1] | 8 [-9.1; 25.1] | 7.8 [-6.9; 22.5] |
| Lovejoy et al. (2002a)(20) | 18.6 [-9.6; 46.8] | 3.8 [-15.2; 22.8] | 0 [-9.8; 9.8] | 0.8 [-10.2; 11.8] |
| Lovejoy et al. (2002b)(20) | 19 [-10.7; 48.7] | 2.4 [-6.2; 11] | 0.9 [-8.6; 10.4] | -1.9 [-12.6; 8.8] |
| Luscombe et al. (1999)(21) | 1.7 [-57.8; 61.2] | 1.7 [-9.7; 13.1] | 5.7 [-6.2; 17.6] | 3.6 [-12.9; 20.1] |
| Miyashita et al. (2004)(22) | 5.3 [-7.2; 17.8] | **-1.6 [-4.6; 1.4]** | **13.9 [11.5; 16.3]**** | N/A |
| Parillo et al. (1992)(23) | 18.1 [-26.5; 62.7] | -3.4 [-21.9; 15.1] | 4.2 [-13.5; 21.9] | N/A |
| Parillo et al. (1996a)(24) | 21.4 [-28.1; 70.9] | 0 [-16.3; 16.3] | 0 [-13.9; 13.9] | N/A |
| Parillo et al. (1996b)(24) | 22.8 [-31.6; 77.2] | 0 [-16.1; 16.1] | 0 [-19.9; 19.9] | N/A |
| Rodriguez-Villar et al. (2000)(25) | 9.4 [-23.1; 41.9] | -0.4 [-21.9; 21.1] | 2.1 [-15.4; 19.6] | -3.1 [-25.4; 19.2] |
| Rodriguez-Villar et al. (2004)(26) | -1.4 [-38; 35.2] | 2.8 [-9.6; 15.2] | -3 [-15.7; 9.7] | 4.6 [-9.4; 18.6] |
| Rusmussen et al. (1994)(27, 28) | 0 [-34.6; 34.6] | 5.6 [-7.5; 18.7] | 0 [-23.1; 23.1] | 8.6 [-11.6; 28.8] |
| Sestoft et al. (1985)(29) | 16.5 [-0.6; 33.6] | 2.6 [-14.6; 19.8] | 10.3 [5.6; 15] | **-11.3 [-17.7; -4.9]**** |
| Simpson et al. (1982)(30) | -13 [-52; 26] | 0 [-10.5; 10.5] | 16.7 [-3.1; 36.5] | 2.2 [-16.8; 21.2] |
| Storm et al. (1997a)(31) | 8.2 [-33.5; 49.9] | 5.8 [-8.9; 20.5] | -7.1 [-23; 8.8] | 4.5 [-17.3; 26.3] |
| Storm et al. (1997b)(31) | -10 [-55.5; 35.5] | -5.6 [-21.1; 9.9] | 8.3 [-5.7; 22.3] | -5.9 [-28.6; 16.8] |

Abbreviations: CI=confidence intervals; N/A=Not assessed; TC=total cholesterol; TG=triglycerides; HDL-C =HDL cholesterol; LDL-C=LDL cholesterol

Data in bold are outliers excluded from meta-analyses

Significant %Change was indicated as * for *P*<0.05 and ** for *P*<0.01
